# Supplementary material for: Tetrazole-stabilized Ag nanoparticles incorporated into TiO2 nanotubes for oxygen electroreduction
Source: Royal Society of Chemistry journal article supplement (doi:10.1039/d4nj04374j), 2024-01-01
Supplement: d4nj04374j1.pdf [file d4nj04374j1.pdf]

Supporting information

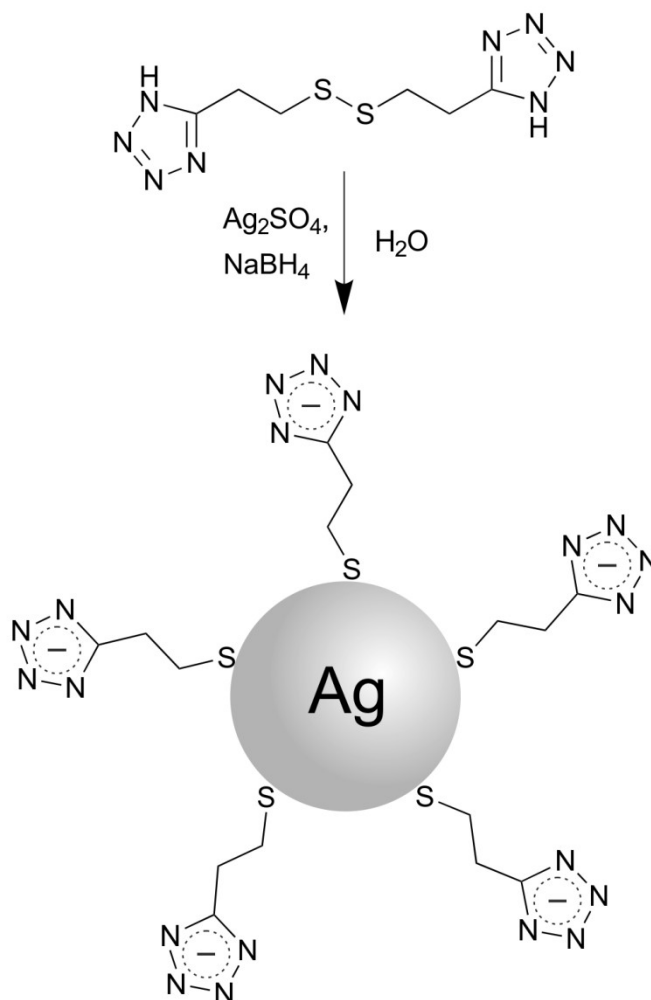

Figure S1. Scheme for the synthesis of tz-Ag NPs

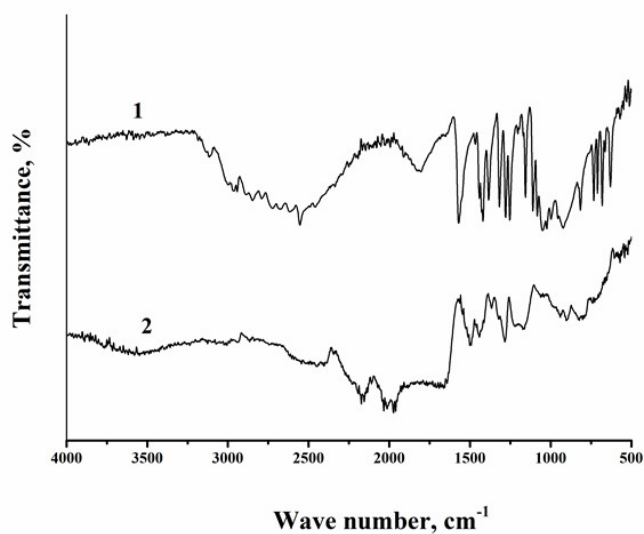

Figure S2. IR spectra of 5-(2-mercaptoethyl)tetrazole (1) and Ag NPs stabilized with 5-(2-mercaptoethyl)tetrazole (2)

IR spectra indicate that 5-(2-mercaptoethyl)tetrazole acts as a stabilizer for silver particles. The interaction between the particle surface and the ligand occurs due to the formation of a sulfur-silver bond, as indicated by the disappearance of the doublet of the sulfur-hydrogen bond line at  $2556\text{ cm}^{-1}$ . The absence of NH modes at  $1286\text{ cm}^{-1}$  and  $1297\text{ cm}^{-1}$  indicates deprotonation of nitrogen atom in the ring, and hence the tetrazole ring is negatively charged [1].

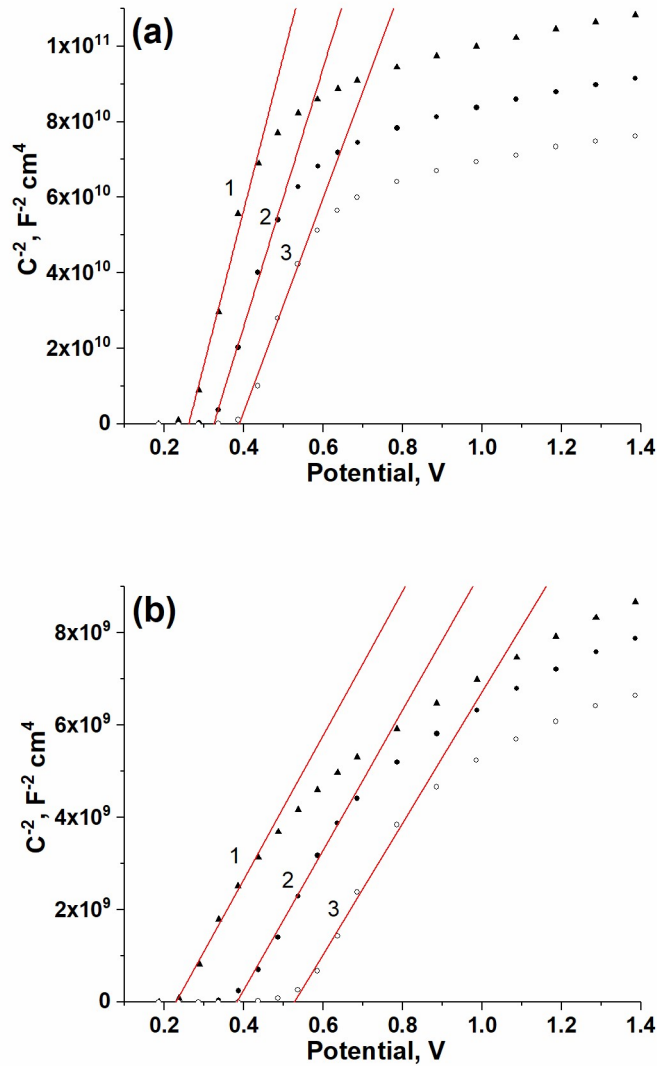

**Figure S3.** Mott-Schottky plots obtained for the TNT electrodes annealed at  $500^{\circ}\text{C}$  in air (a) and in a hydrogen atmosphere (b). Impedance measurements were carried out at frequencies of 1000 Hz (1), 100 Hz (2) and 10 Hz (3)

The concentration of defect states ( $N_d$ ) for the TNT electrodes can be obtained from the Mott-Schottky relation [2]:

$$C_{SC}^{-2} = \left( \frac{2}{\epsilon\epsilon_0 e N_d S^2} \right) \left( E - E_{fb} - \frac{kT}{e} \right), \quad (1)$$

where  $C_{sc}$  is the differential capacitance of the space charge layer,  $S$  the electrode surface,  $E$  the applied potential,  $E_{fb}$  the flatband potential,  $k$  the Boltzmann's constant,  $e$  the electron charge,  $\epsilon_0$  the vacuum permittivity,  $\epsilon$  the relative permittivity,  $N_d$  the ionized donor density and  $T$  the absolute temperature.

The value of the relative permittivity was 57 [3–5].

From the slope of the linear part of the  $C_{sc}^{-2}$  vs.  $E$  at negative potentials the ionized donor density ( $N_d$ ) can be calculated, which was  $6.05 \times 10^{18} \text{ cm}^{-3}$  for TNT layers heated in air, and  $1.43 \times 10^{20} \text{ cm}^{-3}$  for TNT layers heated in hydrogen (Figure S3). The obtained data confirm the fact that TNT layers after annealing in  $H_2$  atmosphere have a noticeably higher concentration of defects compared to TNT heated in air.

### The preparation of the compact $TiO_2$ electrode

The compact  $TiO_2$  films were obtained by thermal oxidation of titanium electrodes, as well as by hydrolysis of polybutyltitanate. Thermal oxidation of titanium substrates was carried out in air at  $450 \text{ }^\circ\text{C}$  for 3 hours. The heating rate during the oxidation process was  $5 \text{ }^\circ\text{C}$  per minute. The thickness of the films obtained by thermal oxidation was 50 nm.

Thin non-porous  $TiO_2$  films were also produced by sol-gel technique. In this case, polished titanium plates were immersed for a short time in 1 wt. % solution of polybutyltitanate in tert-butanol, dried in air (during the drying process, hydrolysis of polybutyltitanate occurred with the participation of moisture from the air) and then heated at  $200 \text{ }^\circ\text{C}$  for 20 min. To obtain films with a thickness of 50-100 nm, the cycle was repeated 3 times. Finally, the samples were heated at a temperature of  $450 \text{ }^\circ\text{C}$  for 1 h to form a crystalline (anatase) structure.

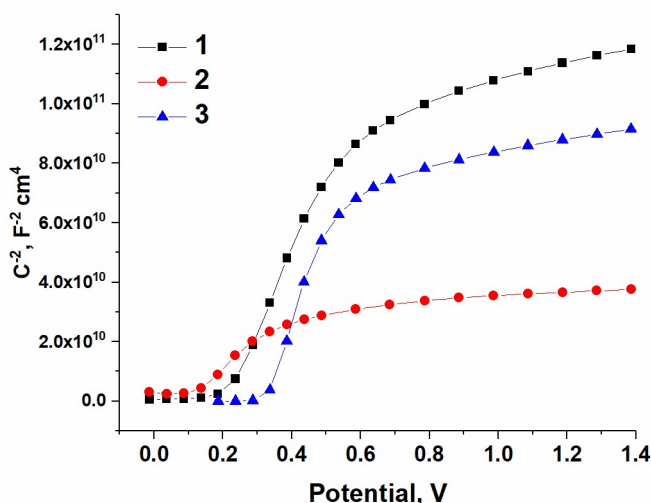

**Figure S4.** Mott-Schottky plots obtained for the compact  $TiO_2$  films produced by sol-gel technique (1) and thermal oxidation (2), and for TNT electrodes (3)

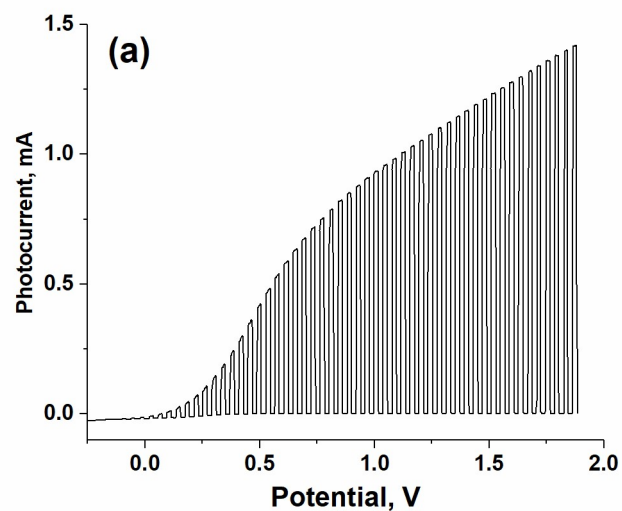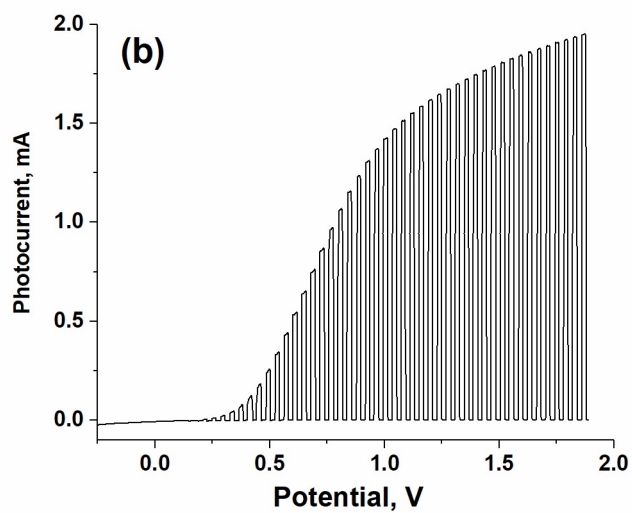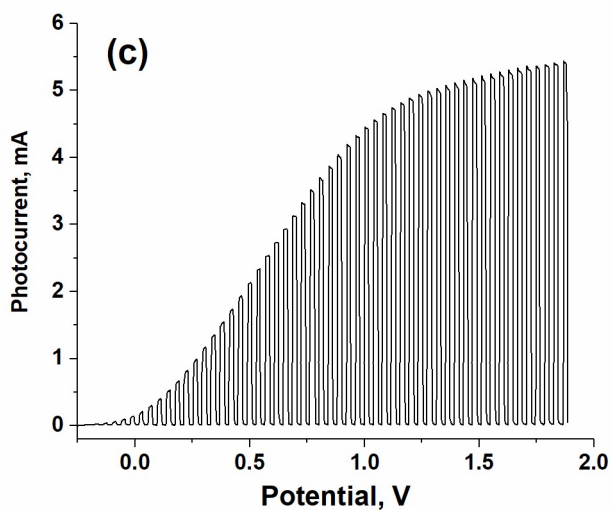

**Figure S5.** Current-potential curves recorded under chopped illumination for the compact TiO<sub>2</sub> electrodes prepared by thermal oxidation (a) and sol-gel technique (b), and for TiO<sub>2</sub> nanotubes annealed in air (c)

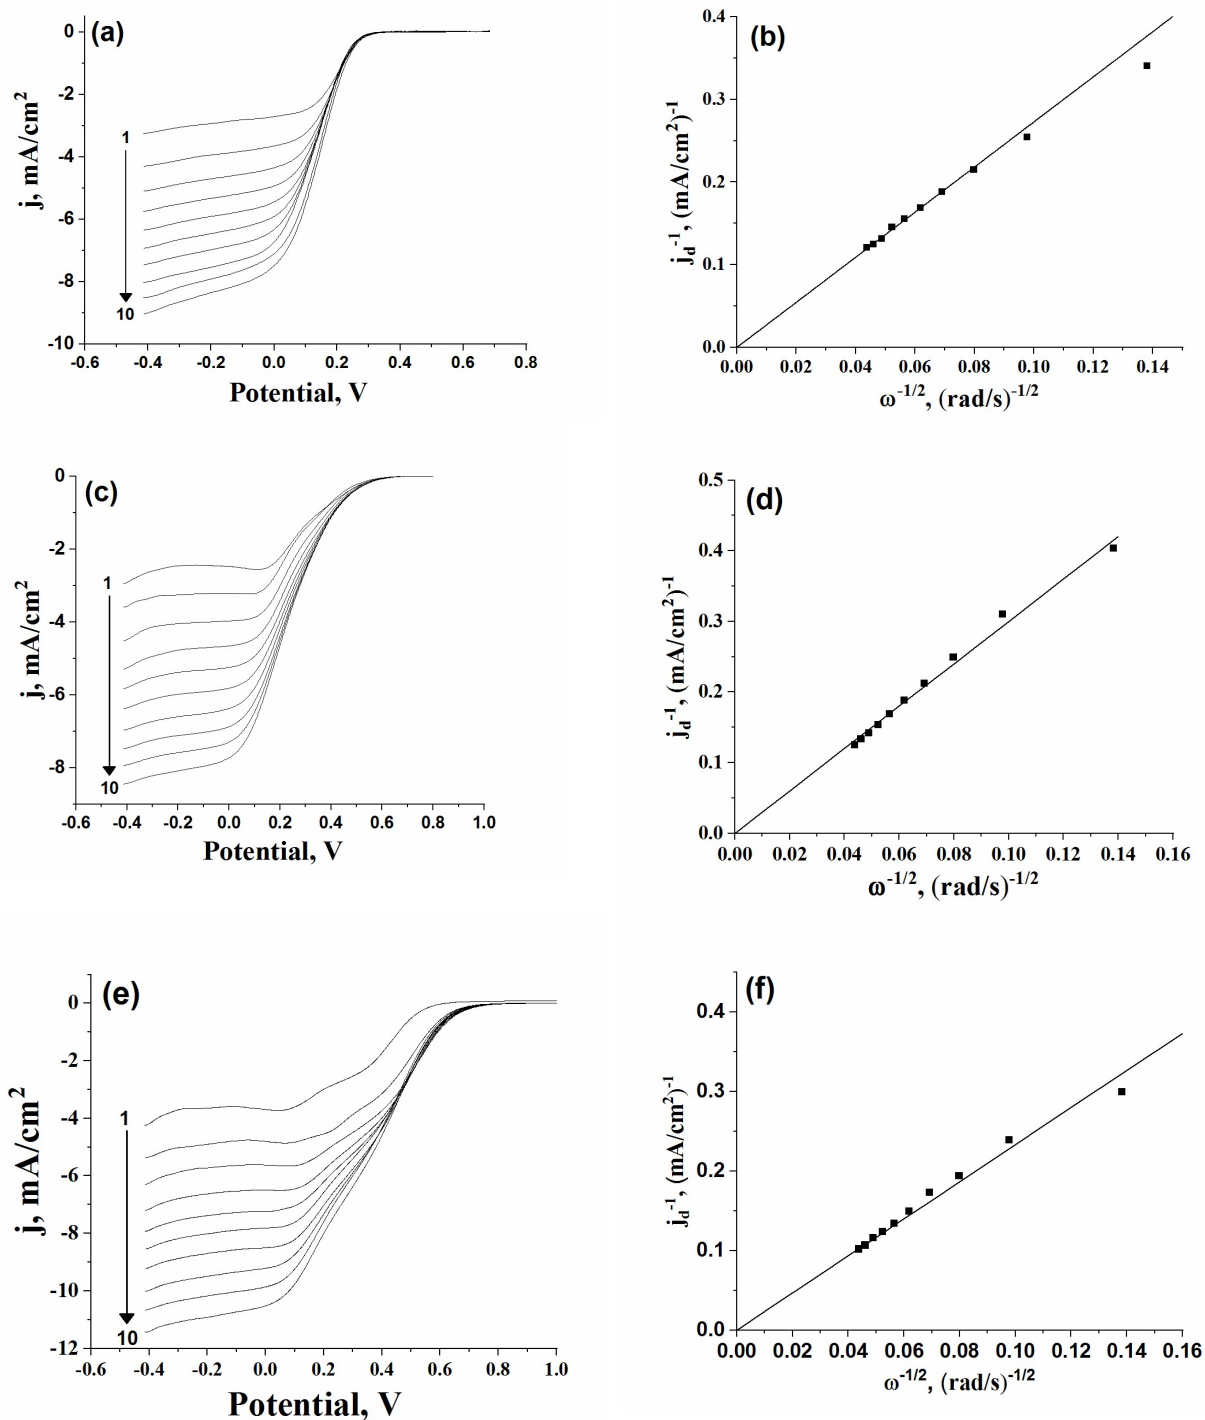

**Figure S6.** The voltammograms (a, c, e) of ORR for various rotation rates (1 – 500 rpm; 2 - 1000 rpm; 3 - 1500 rpm; 4 - 2000 rpm; 5 - 2500 rpm; 6 - 3000 rpm; 7 - 3500 rpm; 8 - 4000 rpm; 9 – 4500 rpm; 10 - 5000 rpm) and Koutecky-Levich plots ( $E = -0.3$  V) (b, d, f) obtained on TNT (a, b), hTNT (c, d) and tz-Ag NPs/hTNT (e, f) in an O<sub>2</sub>-saturated 0.1 M KOH

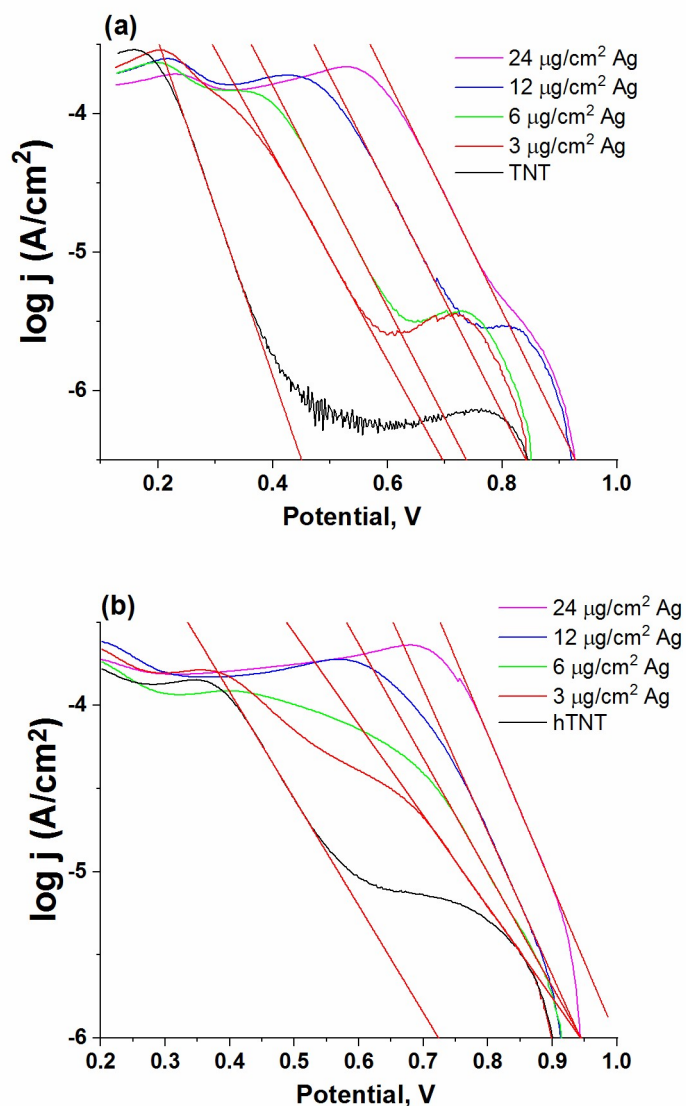

**Figure S7.** Tafel plots for  $\text{O}_2$  electroreduction on tz-Ag NPs/TNT (a) and tz-Ag NPs/hTNT electrodes (b), and on bare TNT (a) and hTNT electrodes (b). Data derived from Fig.5.

The silver wire was soaked in 10 mL of aqueous solution containing 10 mM 5-(2-mercaptoethyl)tetrazole and 0.1 M KOH for 1h. The tz-adsorbed electrode was transferred to  $\text{O}_2$ -saturated 0.1 M KOH solution for electrochemical measurements. Electrochemical experiments were performed in a single-compartment glass cell with a standard three-electrode configuration. An Hg/HgO electrode filled with 1 M KOH (Radiometer Analytical) and a Pt foil were used as the reference and counter electrodes, respectively.

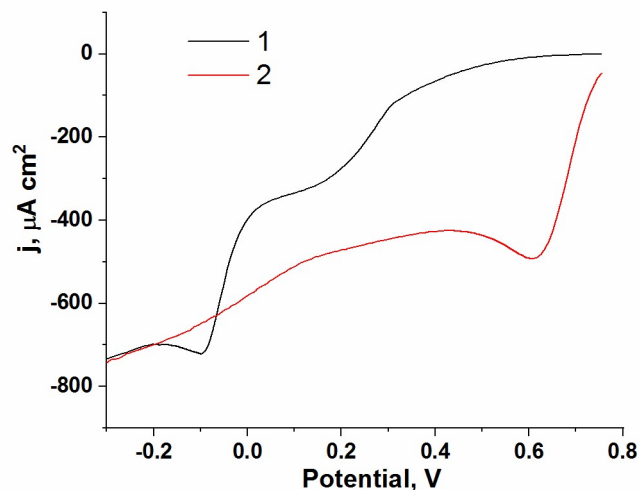

**Figure S8.** Voltammograms of ORR in an oxygen-saturated 0.1 M KOH solution recorded for bulk Ag electrode after adsorption of 5-(2-mercaptoethyl)tetrazole (1 – 1<sup>st</sup> scan; 2 – 2<sup>nd</sup> scan)

### References

- [1] S. Thomas, N. Biswas, S. Venkateswaran, S. Kappor, S. Naumov, T. Mukherjee Studies on Adsorption of 5-amino Tetrazole on Silver Nanoparticles by SERS and DFT Calculations / J. Phys. Chem. A 2005, 109, 9928 – 9934.
- [2] P. Schmuki, H. Böhni, J.A. Bardwell, *In Situ* Characterization of Anodic Silicon Oxide Films by AC Impedance Measurements / J. Electrochem. Soc. 1995, 142, 1705–1712. doi: [10.1149/1.2048644](https://doi.org/10.1149/1.2048644)
- [3] S. Piazza, L. Calà, C. Sunseri, F. Di Quarto, Influence of the crystallization process on the photoelectrochemical behaviour of anodic TiO<sub>2</sub> films, Ber. Bunsenges. Phys. Chem. 1997, 101, 932–942. doi: [10.1002/bbpc.19971010608](https://doi.org/10.1002/bbpc.19971010608)
- [4] D.J. Blackwood, L.M. Peter, The influence of growth rate on the properties of anodic oxide films on titanium, Electrochim. Acta 1989, 34, 1505–1511. doi: [10.1016/0013-4686\(89\)87033-1](https://doi.org/10.1016/0013-4686(89)87033-1)
- [5] M. Schneider, S. Schroth, J. Schilm, A. Michaelis, Micro-EIS of anodic thin oxide films on titanium for capacitor applications, Electrochim. Acta 2009, 54, 2663–2671. doi: [10.1016/j.electacta.2008.11.003](https://doi.org/10.1016/j.electacta.2008.11.003)
